# Supplementary material
Source: PubMed Central journal article supplement (PMC5029154)
Supplement: ismej20162x1.pdf [file ismej20162x1.pdf]

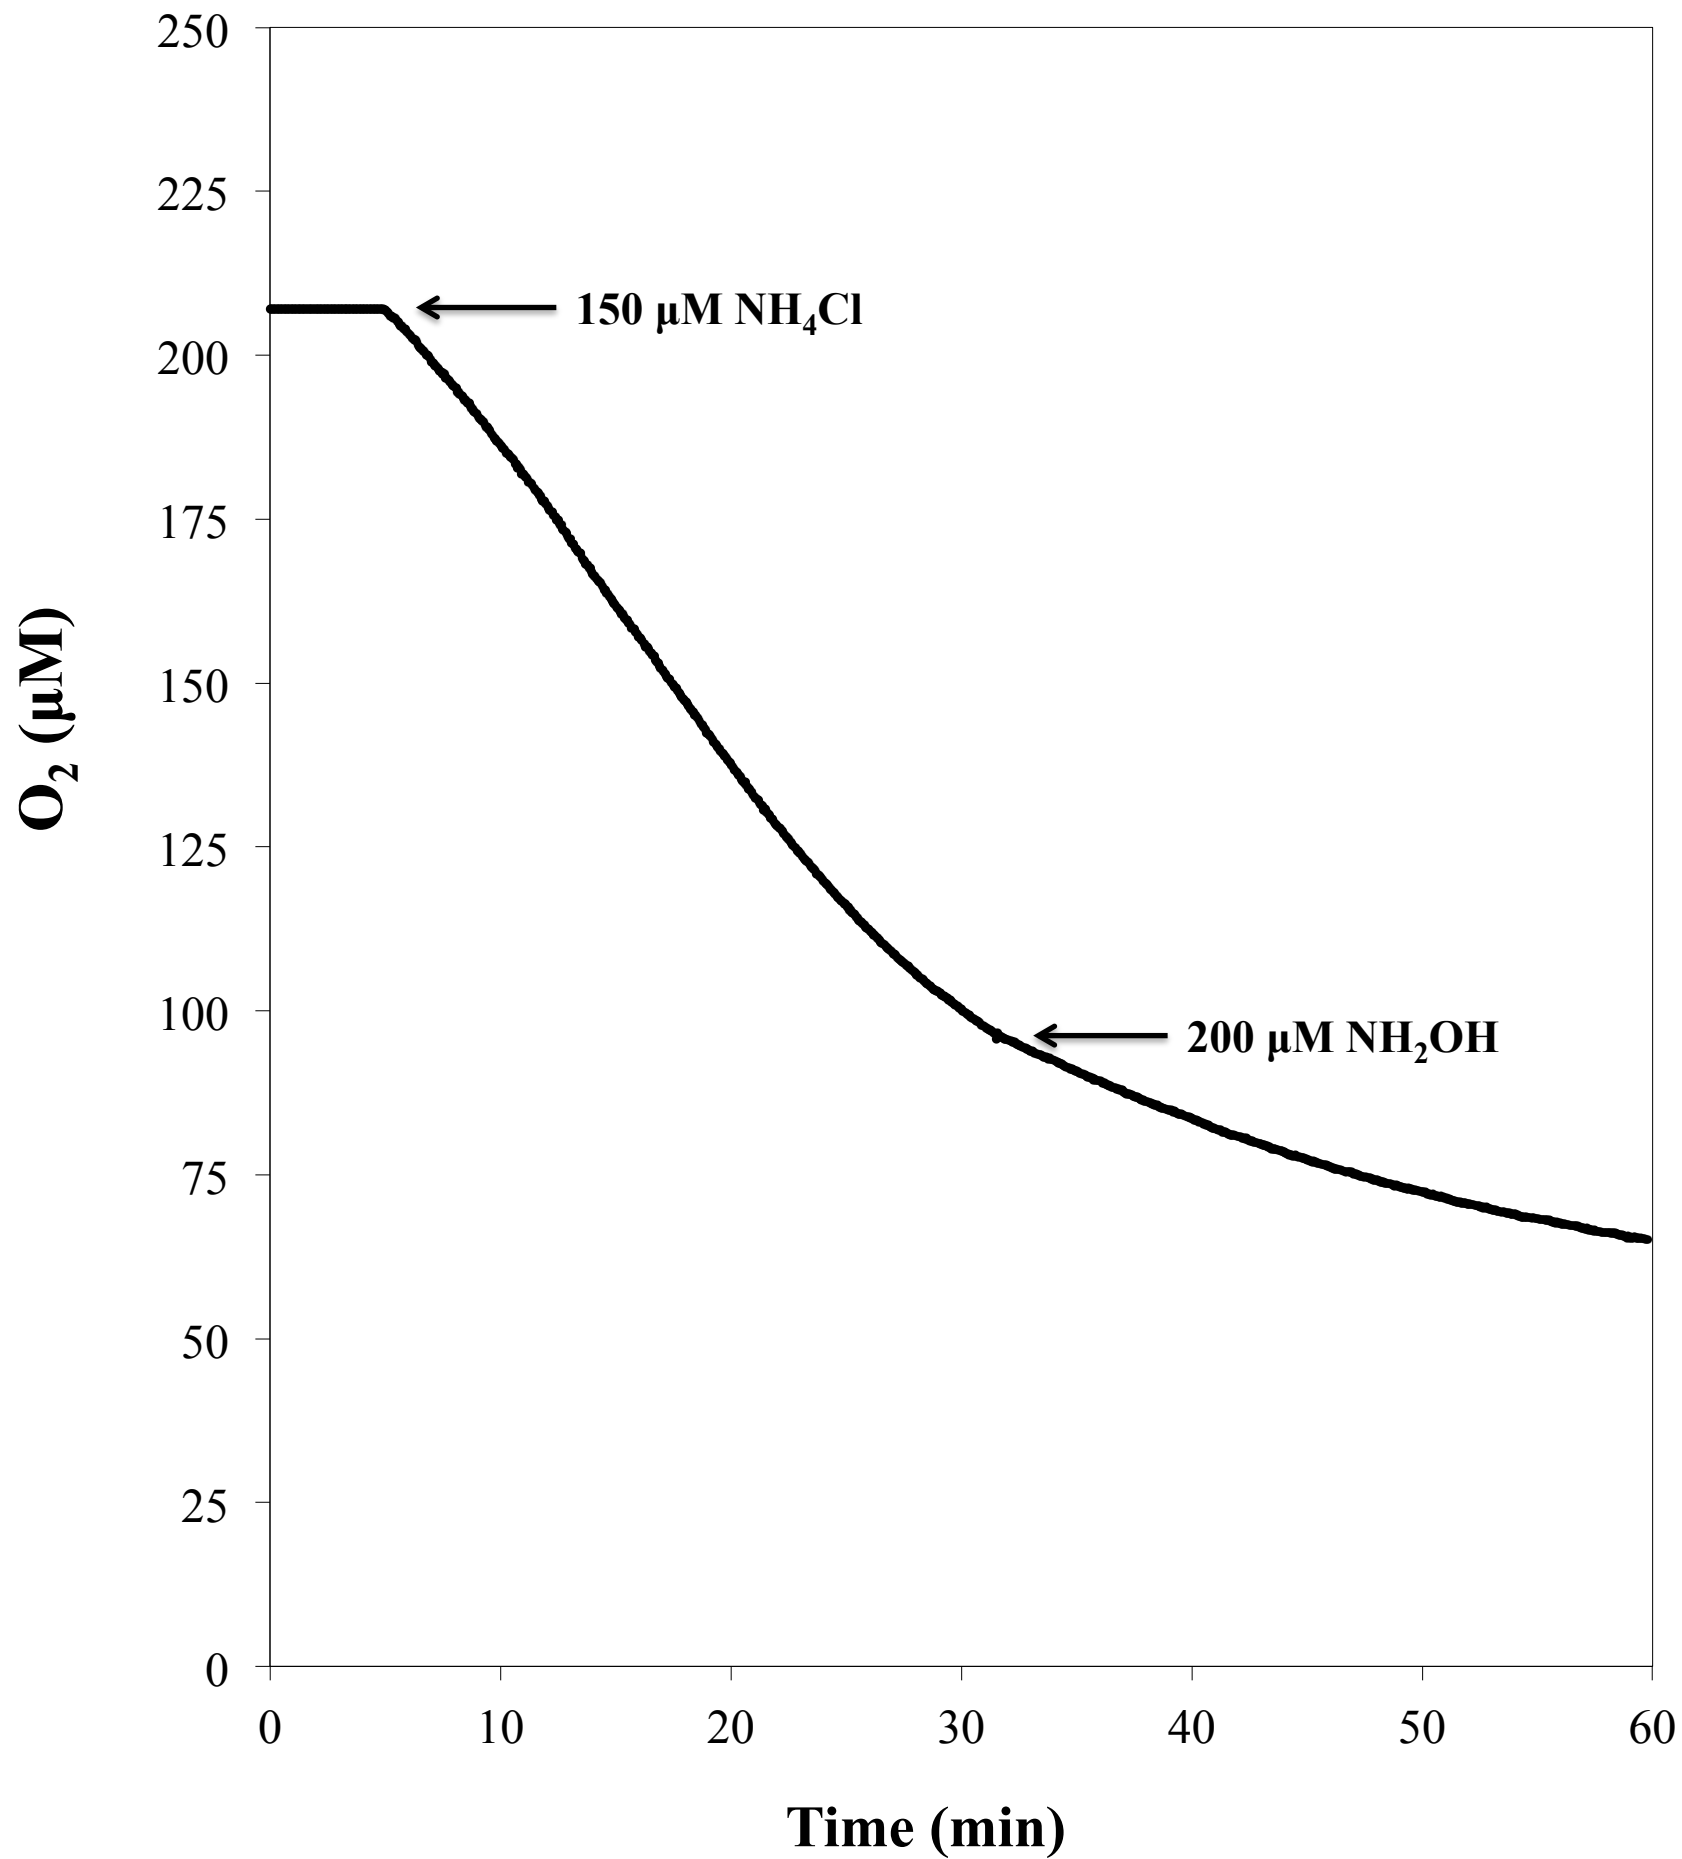

**Figure S1** Oxidation of  $NH_4Cl$  and  $NH_2OH$  by *N.viennensis* cells after 1h incubation with 200  $\mu M$  PTIO

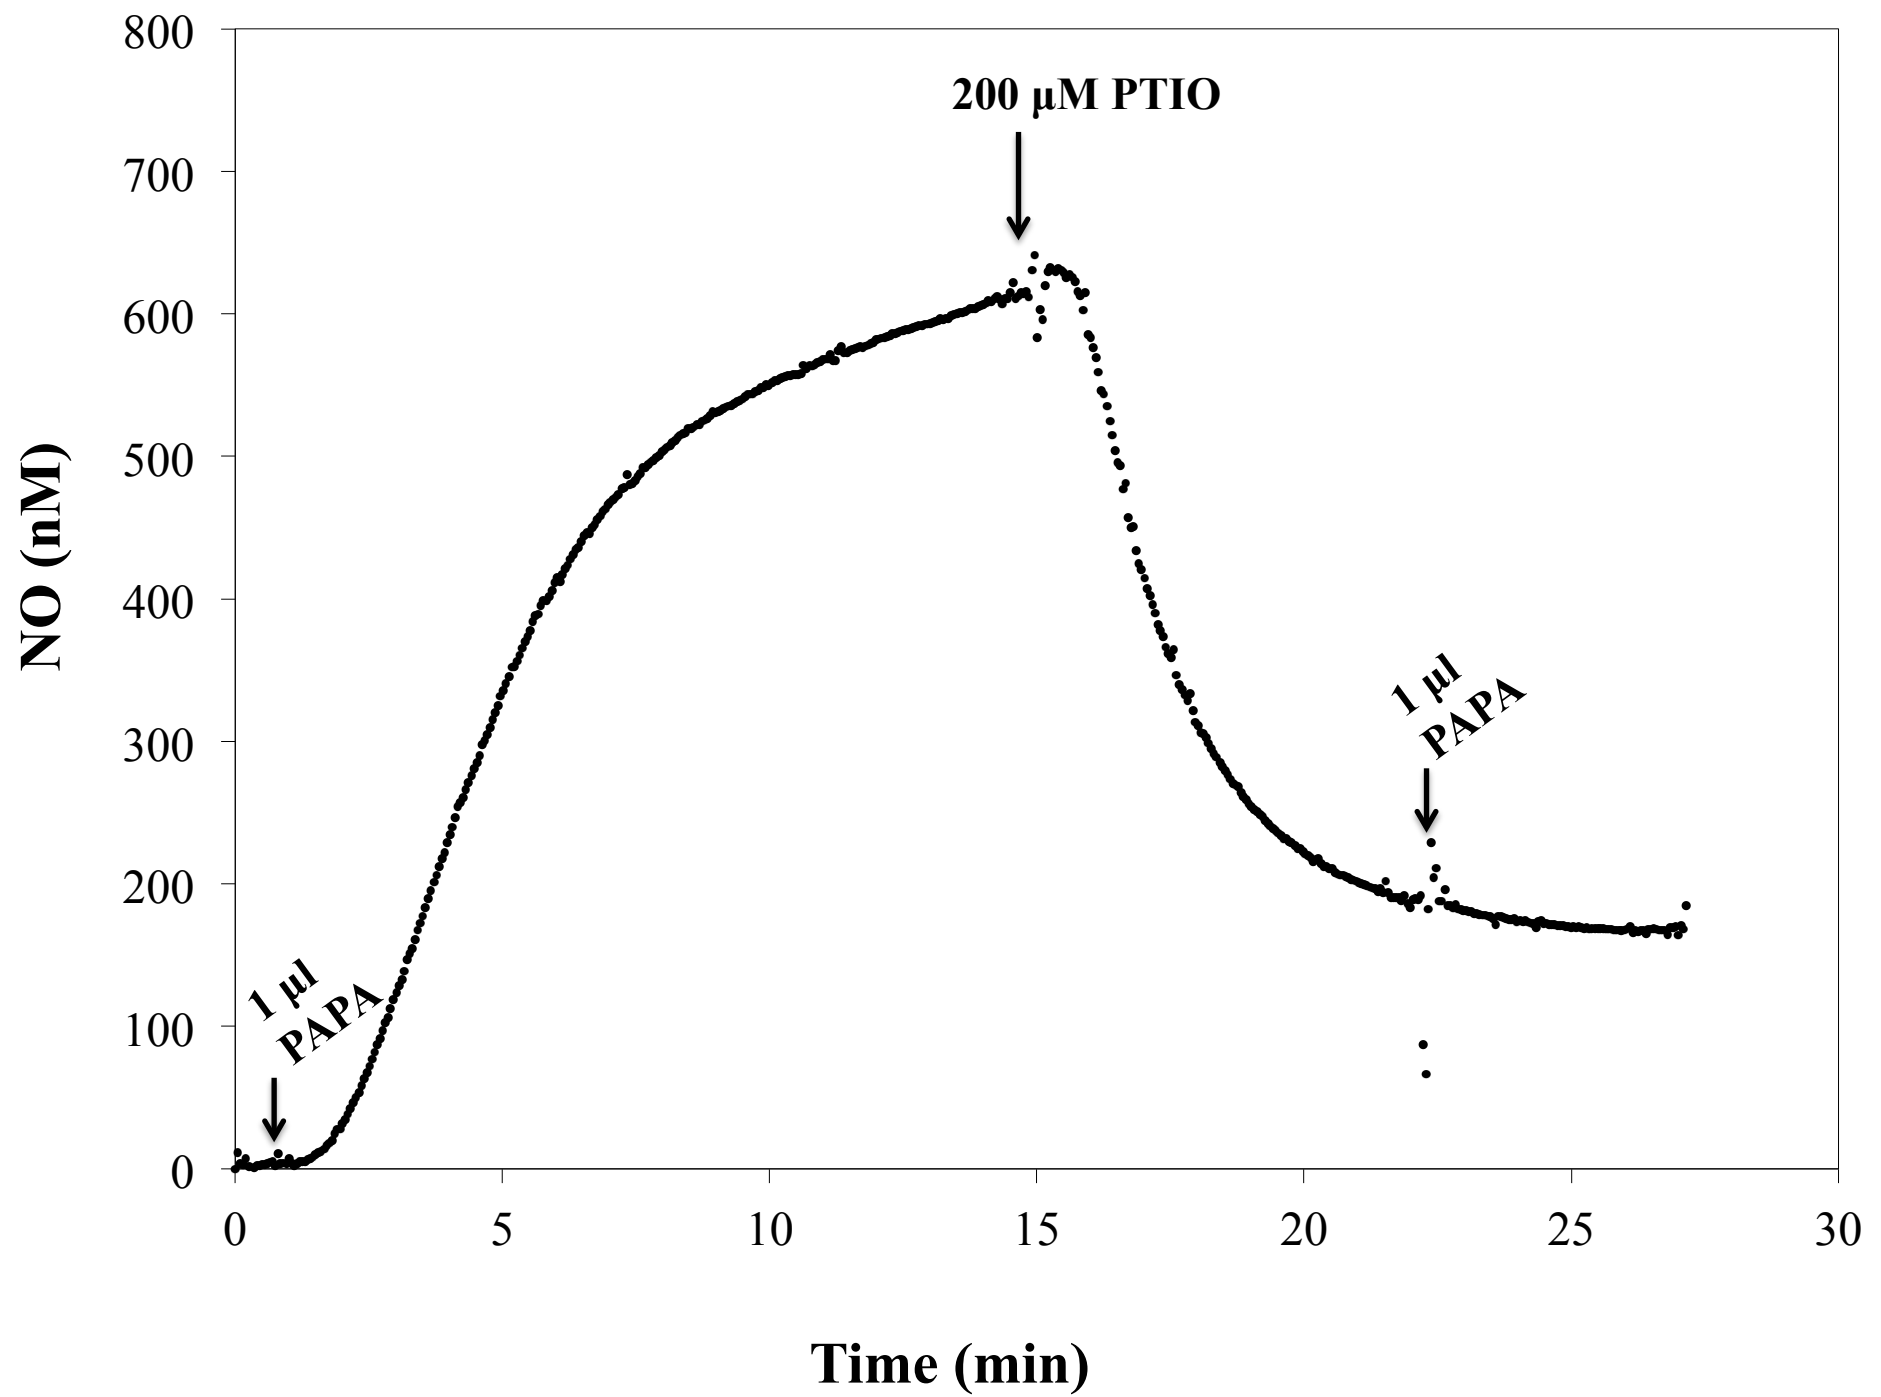

**Figure S2** Abiotic control confirming quenching of NO donated by PAPA-NONOate by the NO chealator PTIO

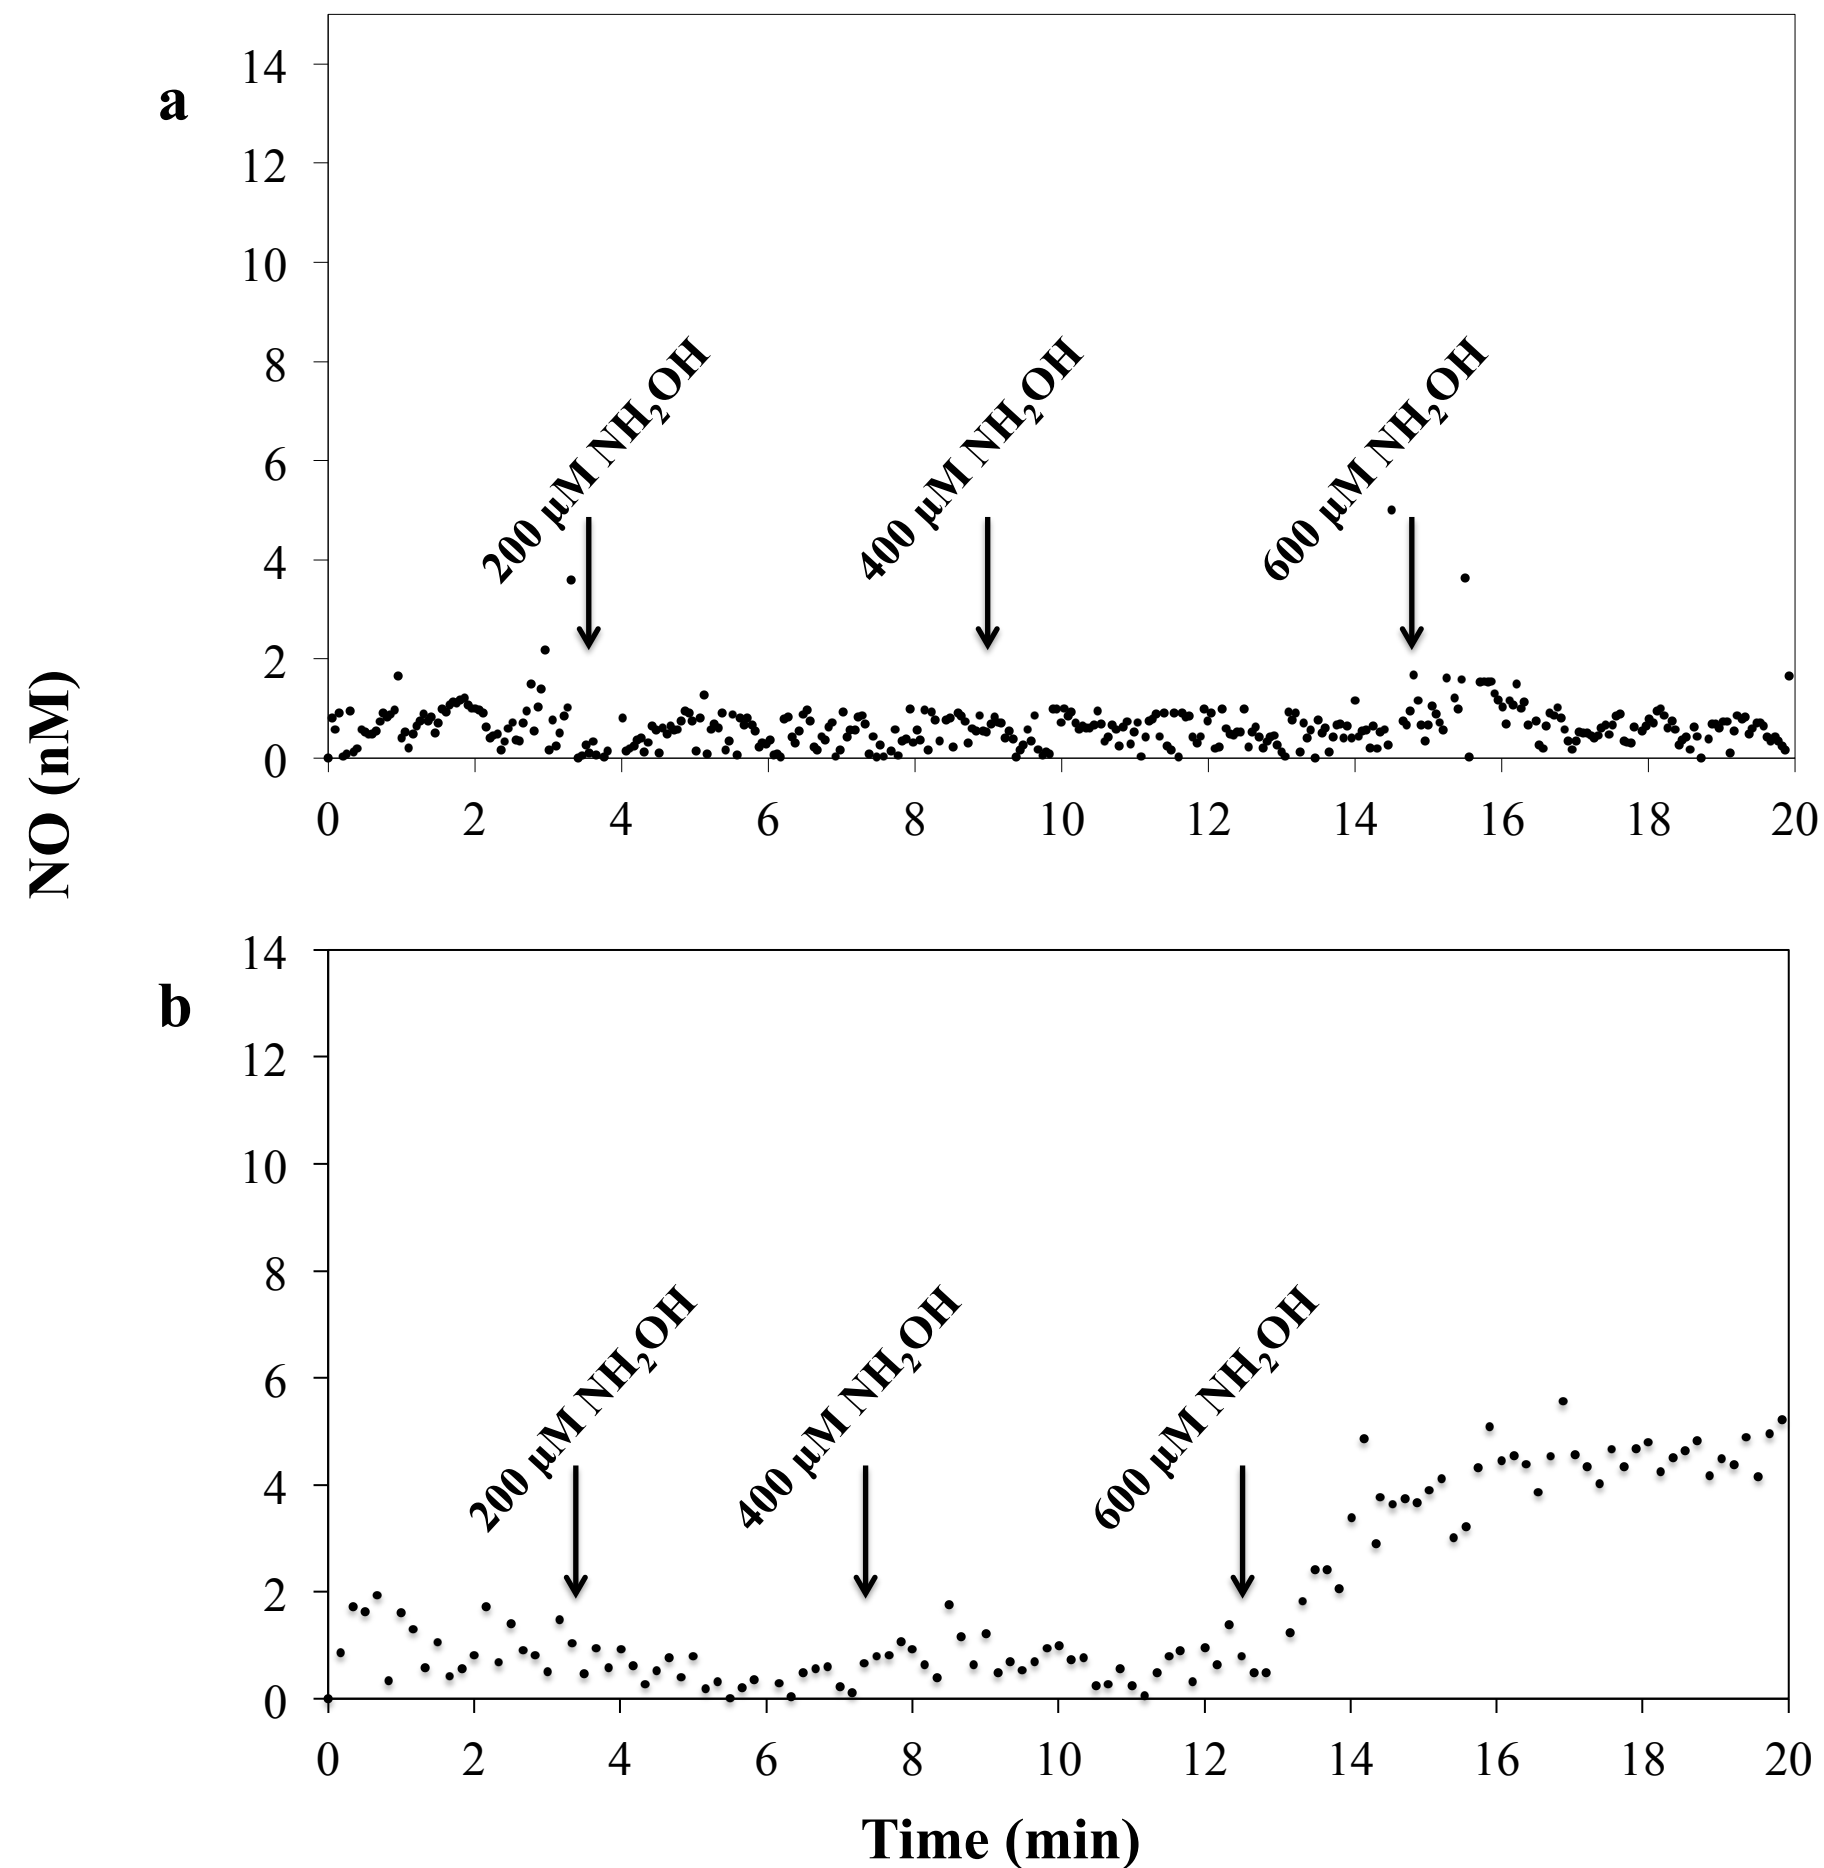

**Figure S3** Measurement of NO during addition of  $\text{NH}_2\text{OH}$  to FWM (**a**) or FWM amended with  $200 \mu\text{M}$   $\text{NO}_2^-$  (**b**). FWM was sparged with  $\text{N}_2$  (0-3%  $\text{O}_2$  saturation; determined by  $\text{O}_2$  electrode) previous to  $\text{NH}_2\text{OH}$  addition.

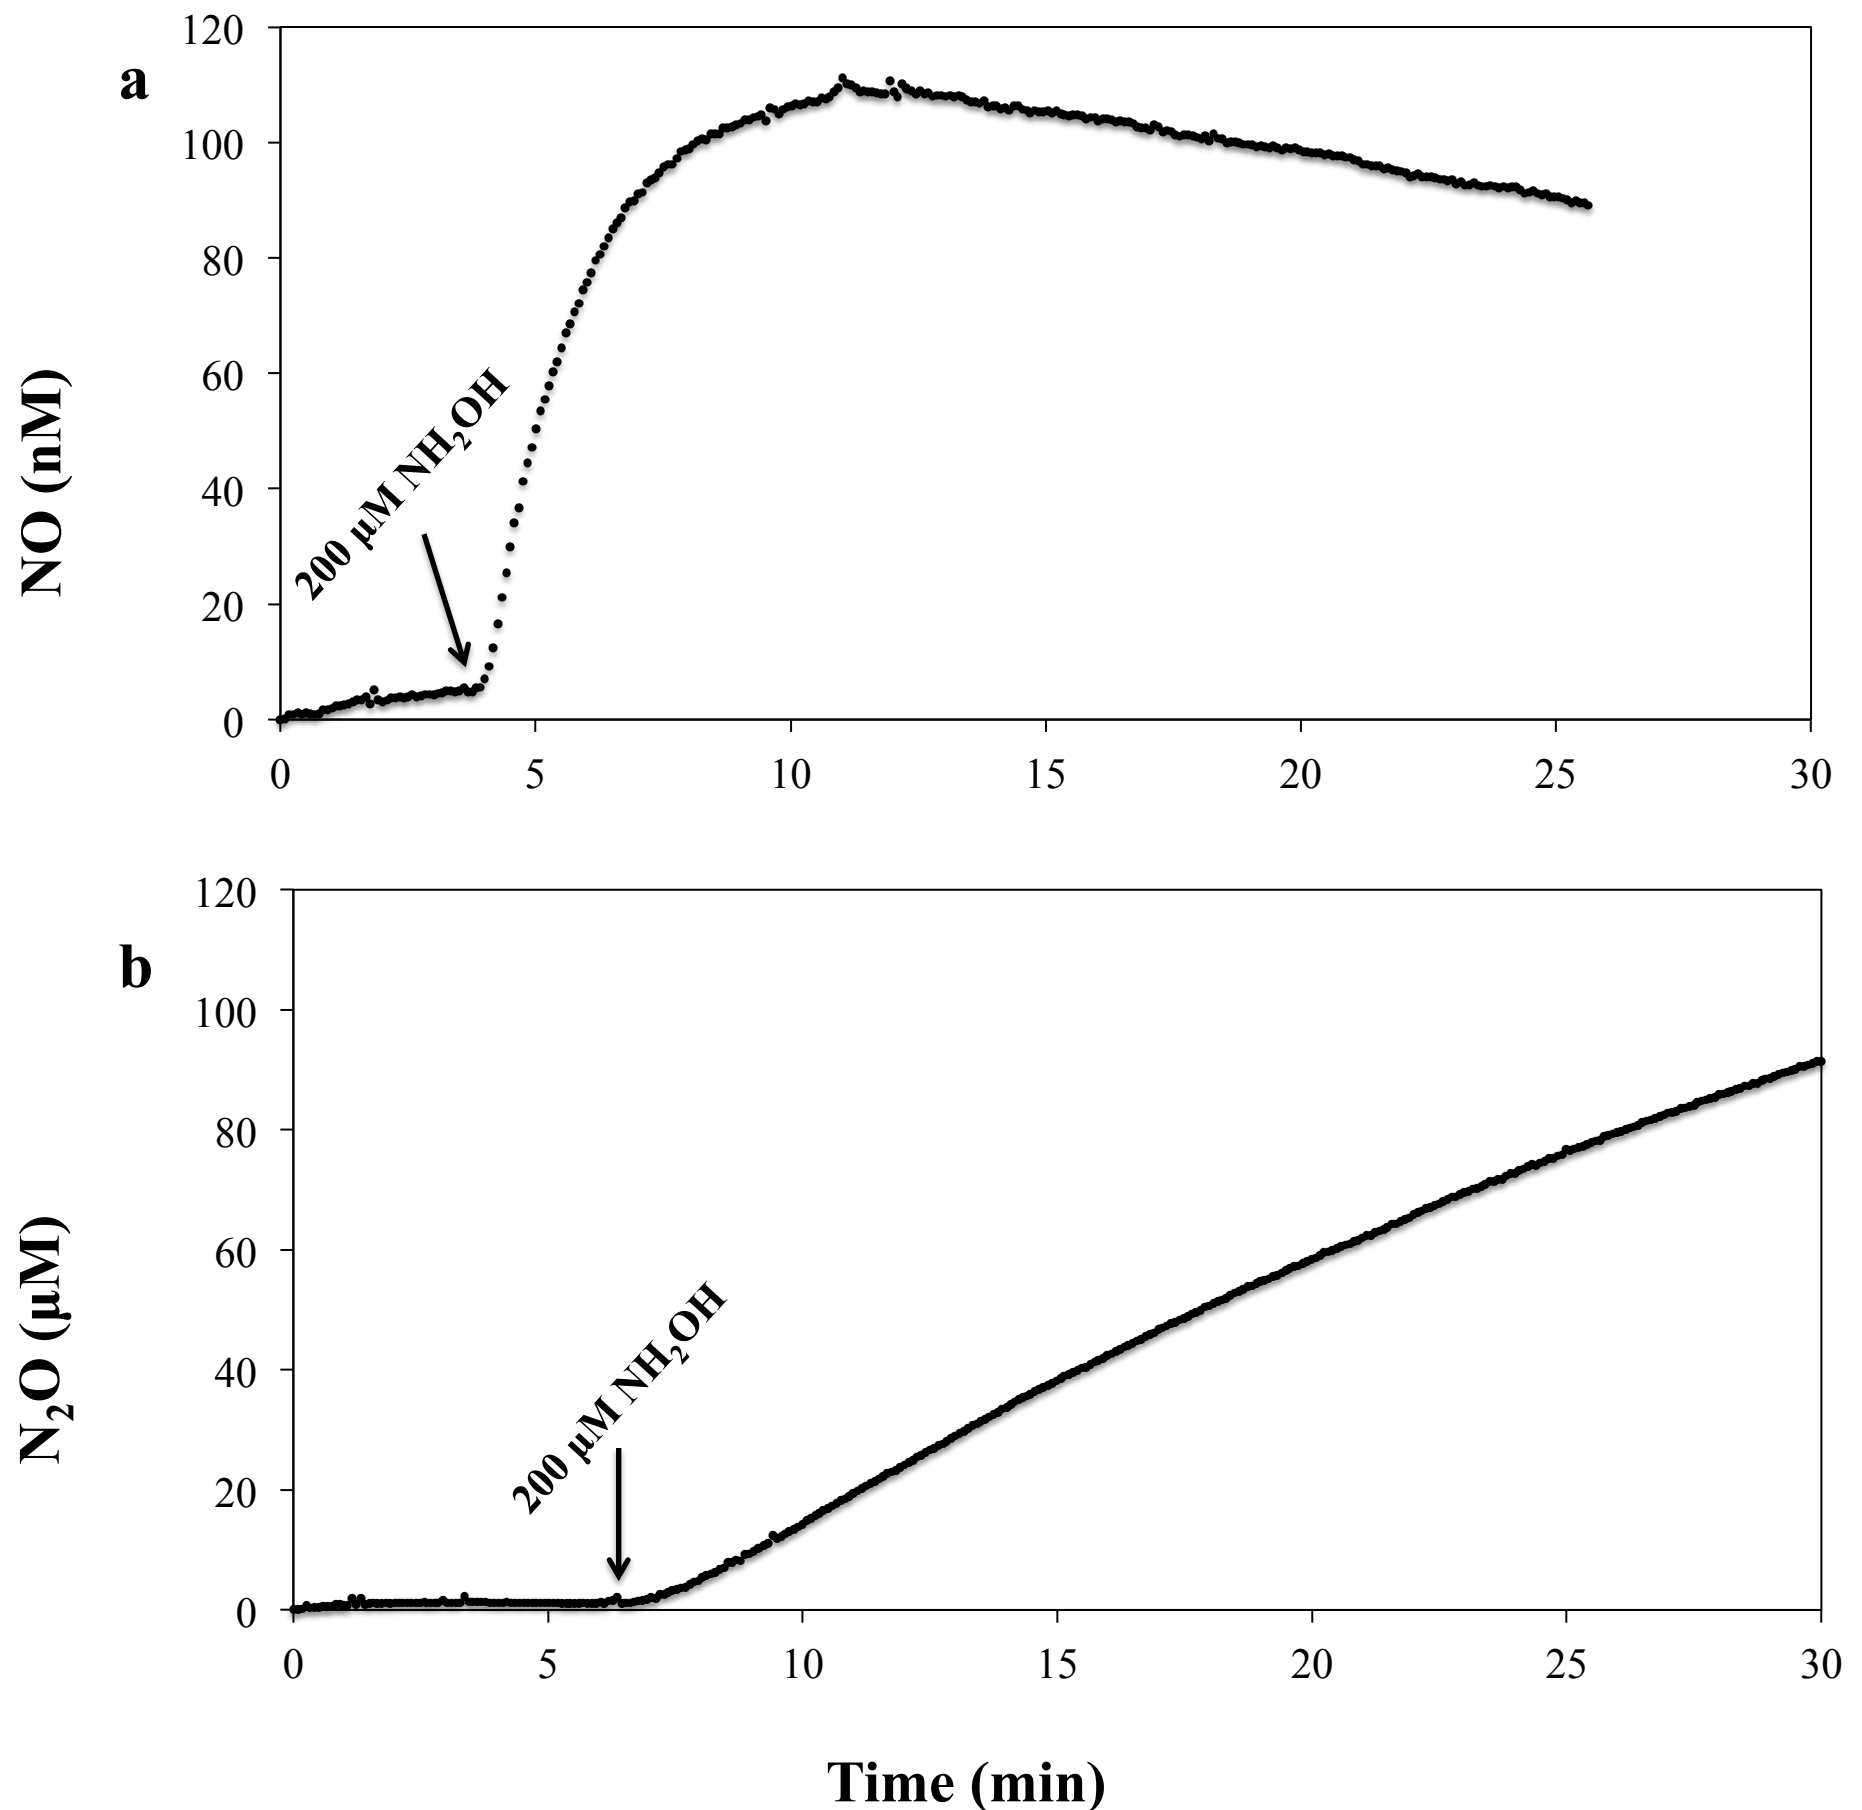

**Figure S4** Measurement of NO (**a**) and  $\text{N}_2\text{O}$  (**b**) from FWM + killed cells ( $1 \times 10^{11}$  total cells) amended with  $200 \mu\text{M}$   $\text{NO}_2^-$  upon addition of  $200 \mu\text{M}$   $\text{NH}_2\text{OH}$ . FWM was sparged with  $\text{N}_2$  (0-3%  $\text{O}_2$  saturation; determined by  $\text{O}_2$  electrode) previous to  $\text{NH}_2\text{OH}$  addition.
